# Supplementary material for: Accounting for cell lineage and sex effects in the identification of cell-specific DNA methylation using a Bayesian model selection algorithm
Source: PLOS journal article supplement (doi:10.1371/journal.pone.0182455), 2017-09-28
Supplement: S1 (10.1371/journal.pone.0182455.s001) [file journal.pone.0182455.s001]

**S1 Table: Percentage of markers associated with SNPs, for sex-specific and common markers by candidate model.** The category ‘Unassigned’ refers to all CpG probes that were not assigned to any marker panel, based on a 5% Bayes’ FDR.

| Model                  | Female | Male  | Common |
|------------------------|--------|-------|--------|
| CD19 <sup>+</sup> B    | 24.19  | 26.82 | 27.05  |
| CD14 <sup>+</sup> Mono | 37.02  | 34.62 | 36.51  |
| CD4 <sup>+</sup> T     | 29.05  | 28.34 | 26.10  |
| CD8 <sup>+</sup> T     | 23.14  | 19.47 | 21.97  |
| CD16 <sup>+</sup> Neu  | 37.11  | 33.85 | 38.84  |
| CD56 <sup>+</sup> NK   | 33.70  | 36.82 | 36.02  |
| Pan T                  | 24.43  | 24.79 | 25.65  |
| Lymphocyte-I           | 28.03  | 27.55 | 28.46  |
| Lymphocyte-II          | 30.68  | 27.88 | 30.91  |
| Myeloid                | 34.22  | 30.58 | 34.92  |
| All                    | 34.84  | 34.62 | 35.46  |
| Unassigned             | 26.81  | 26.75 | 26.61  |
